# Supplementary material for: Germline Variants in 32 Cancer-Related Genes among 700 Chinese Breast Cancer Patients by Next-Generation Sequencing: A Clinic-Based, Observational Study
Source: MDPI journal article supplement (doi:10.3390/ijms231911266), 2022-09-24
Supplement: s1 [file s1]

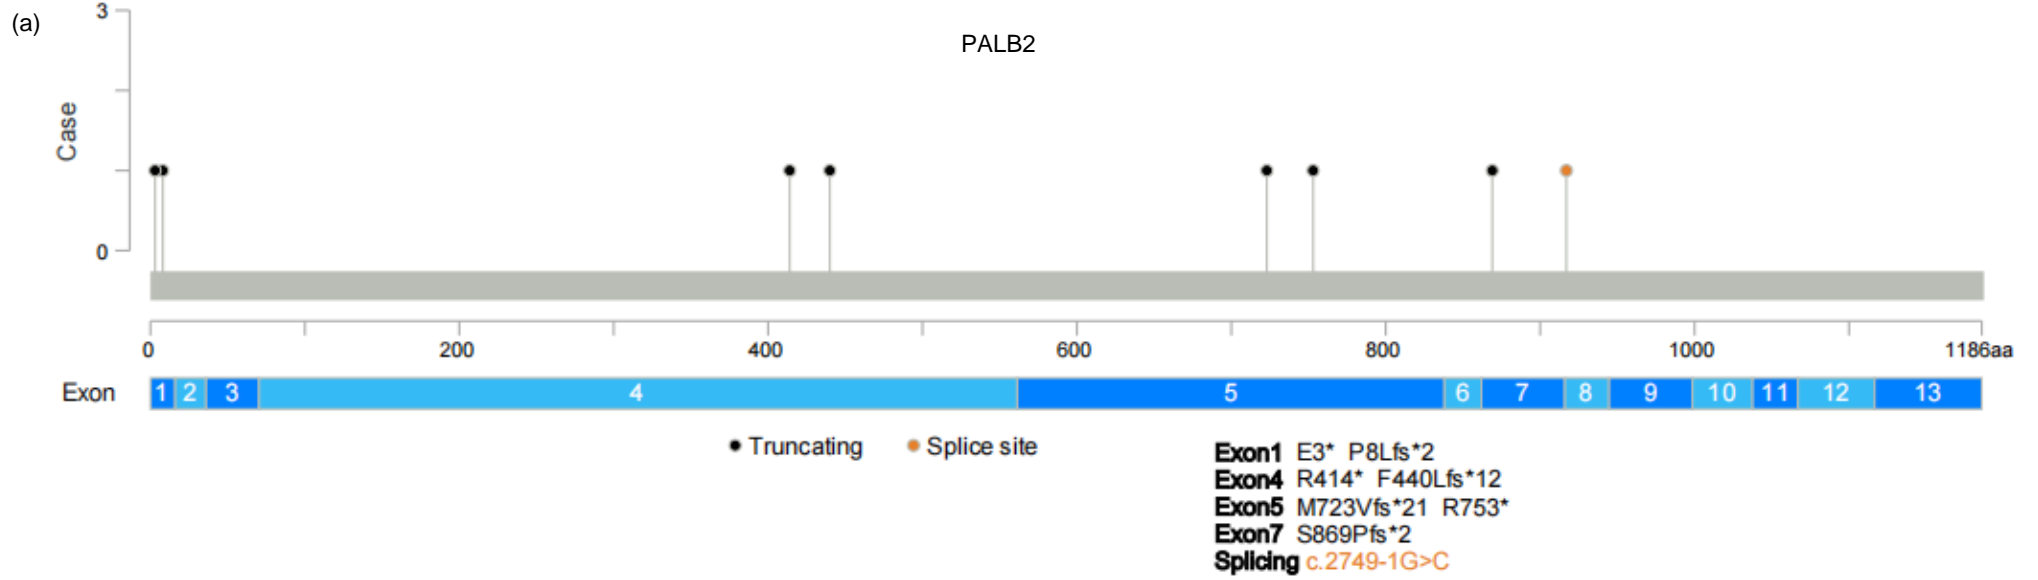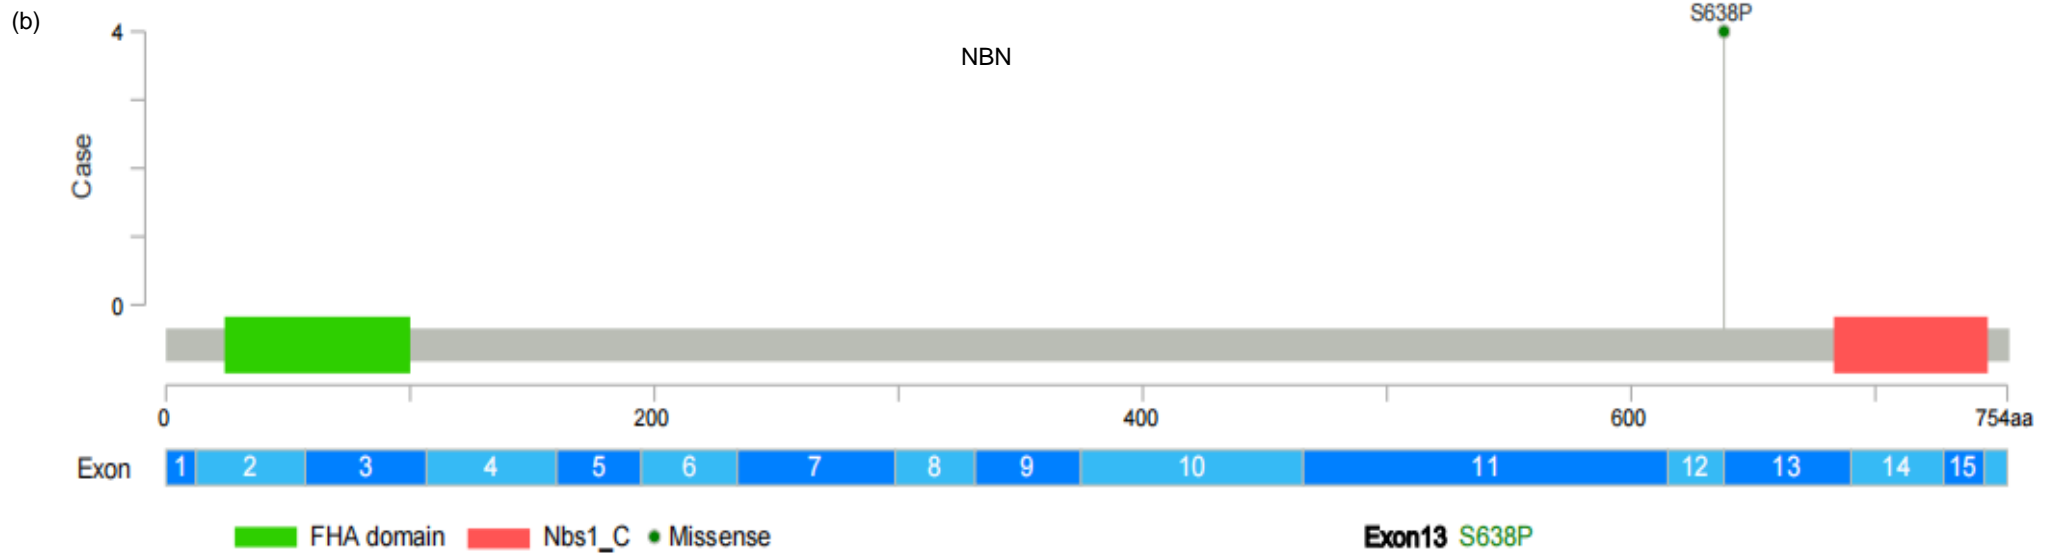

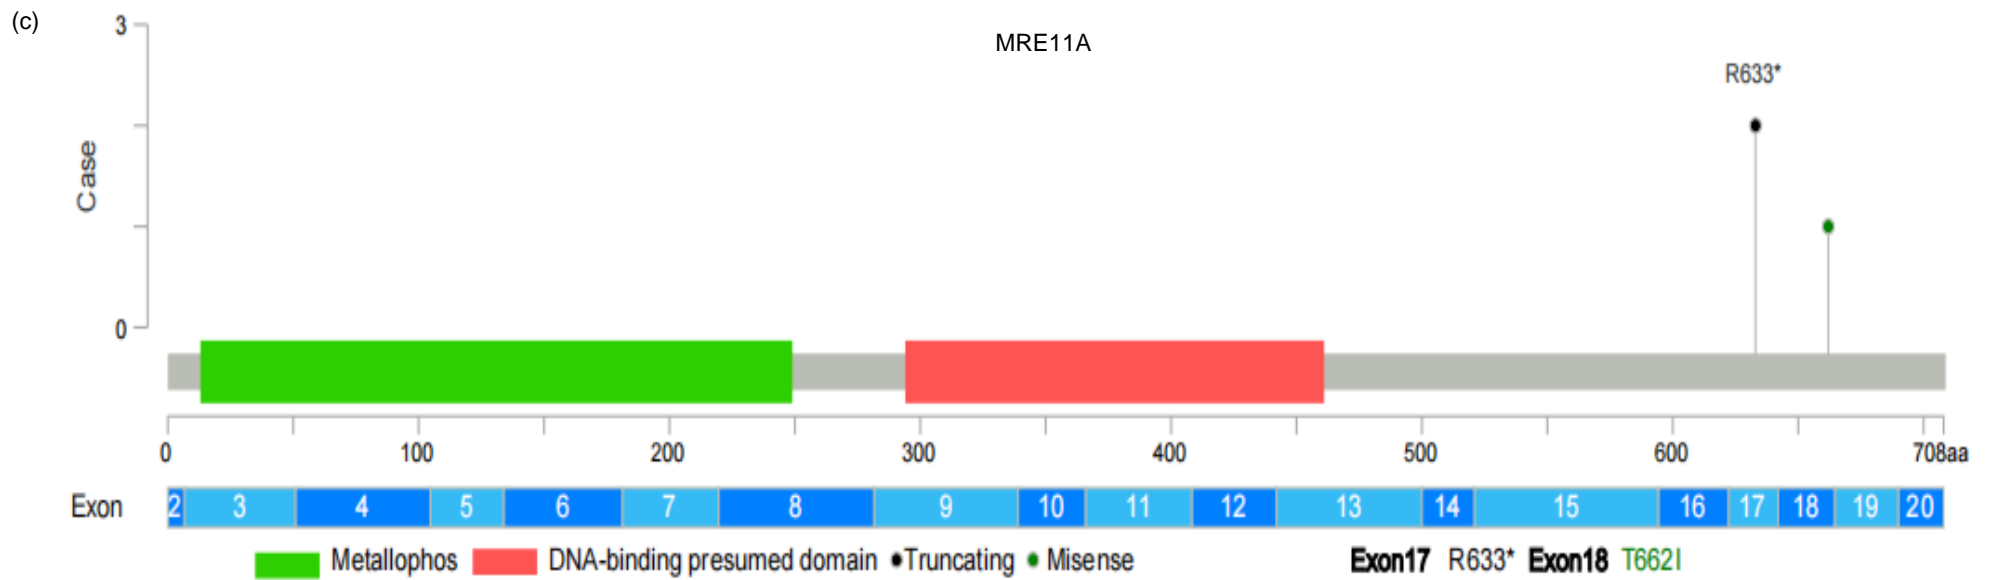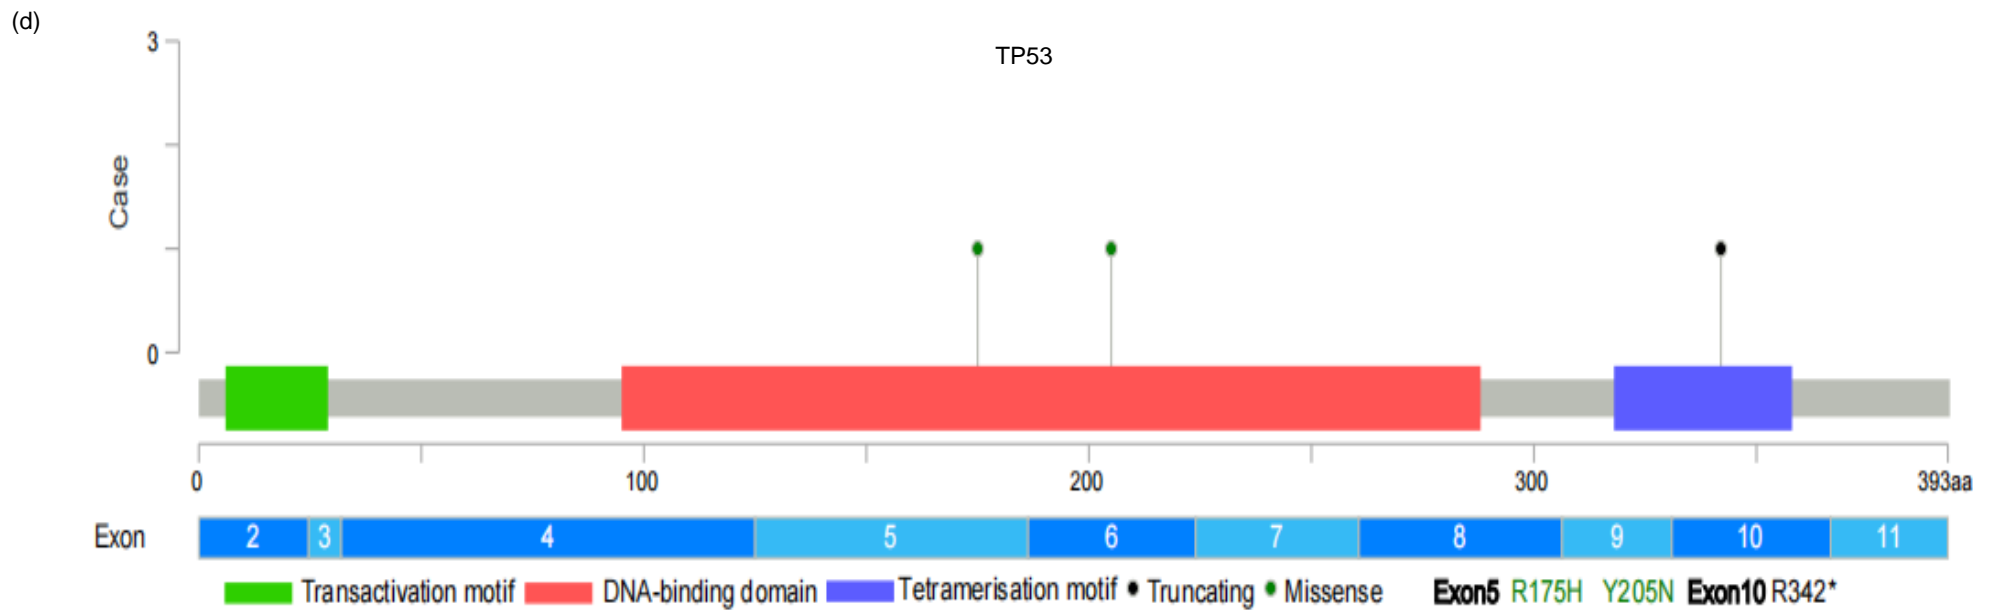

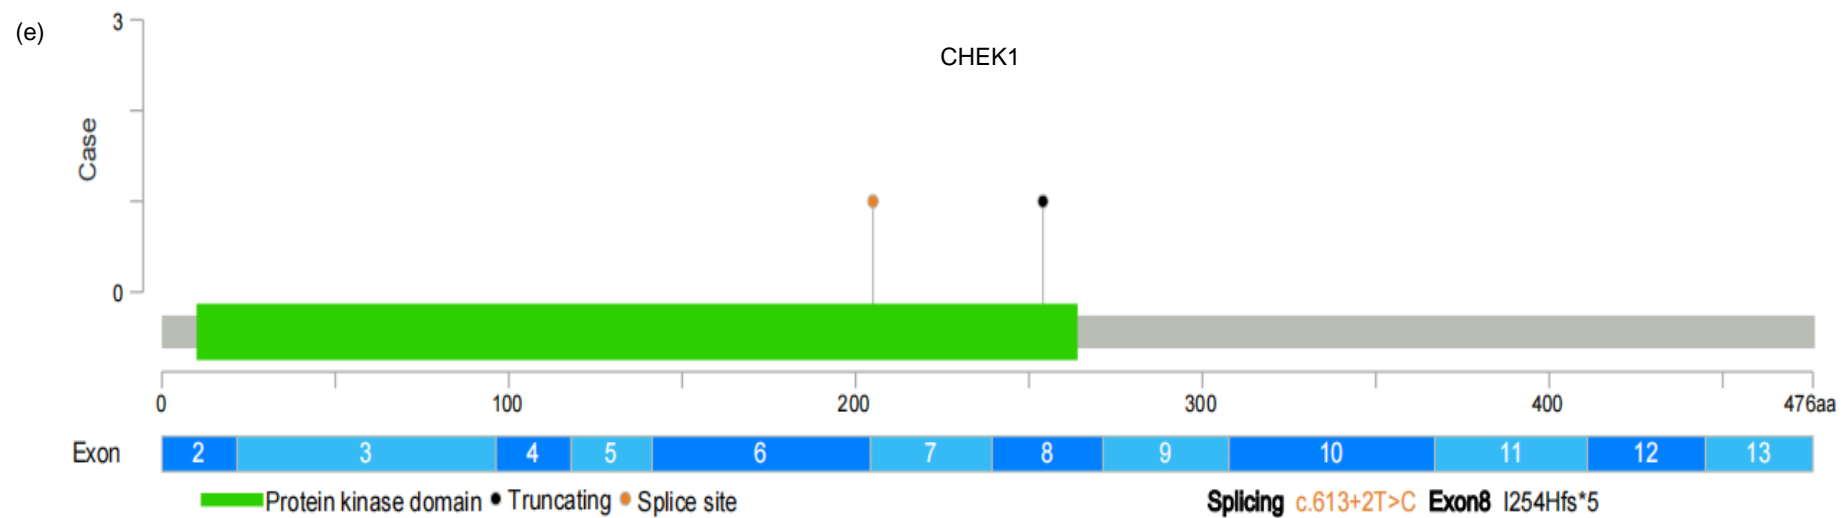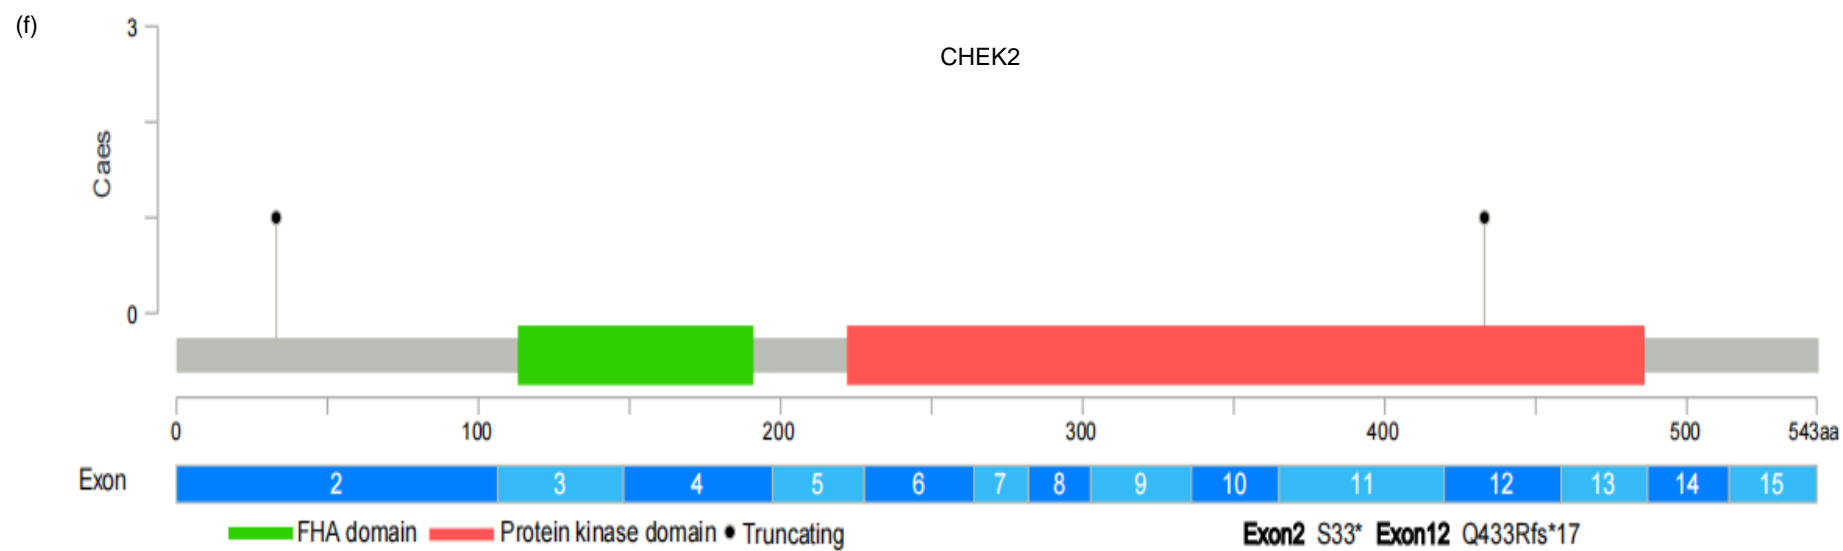

(g)

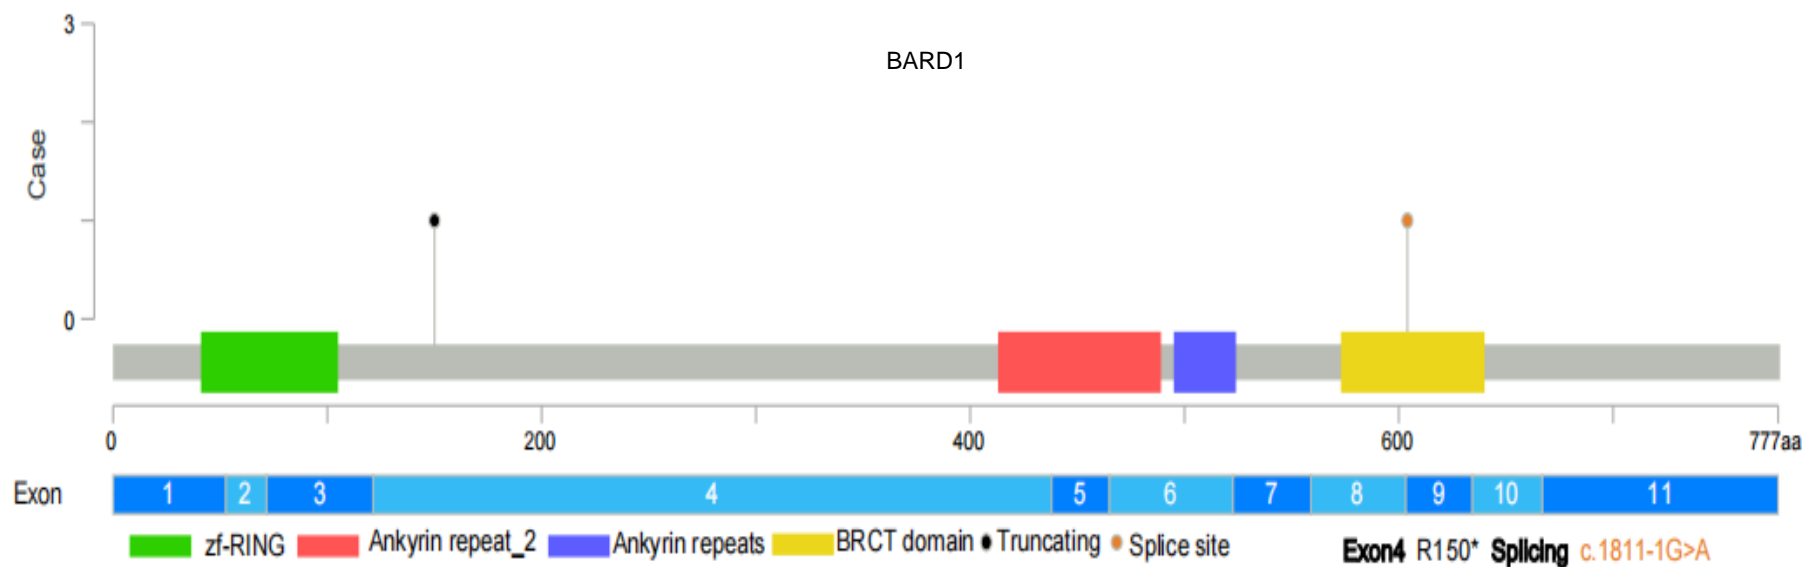

(h)

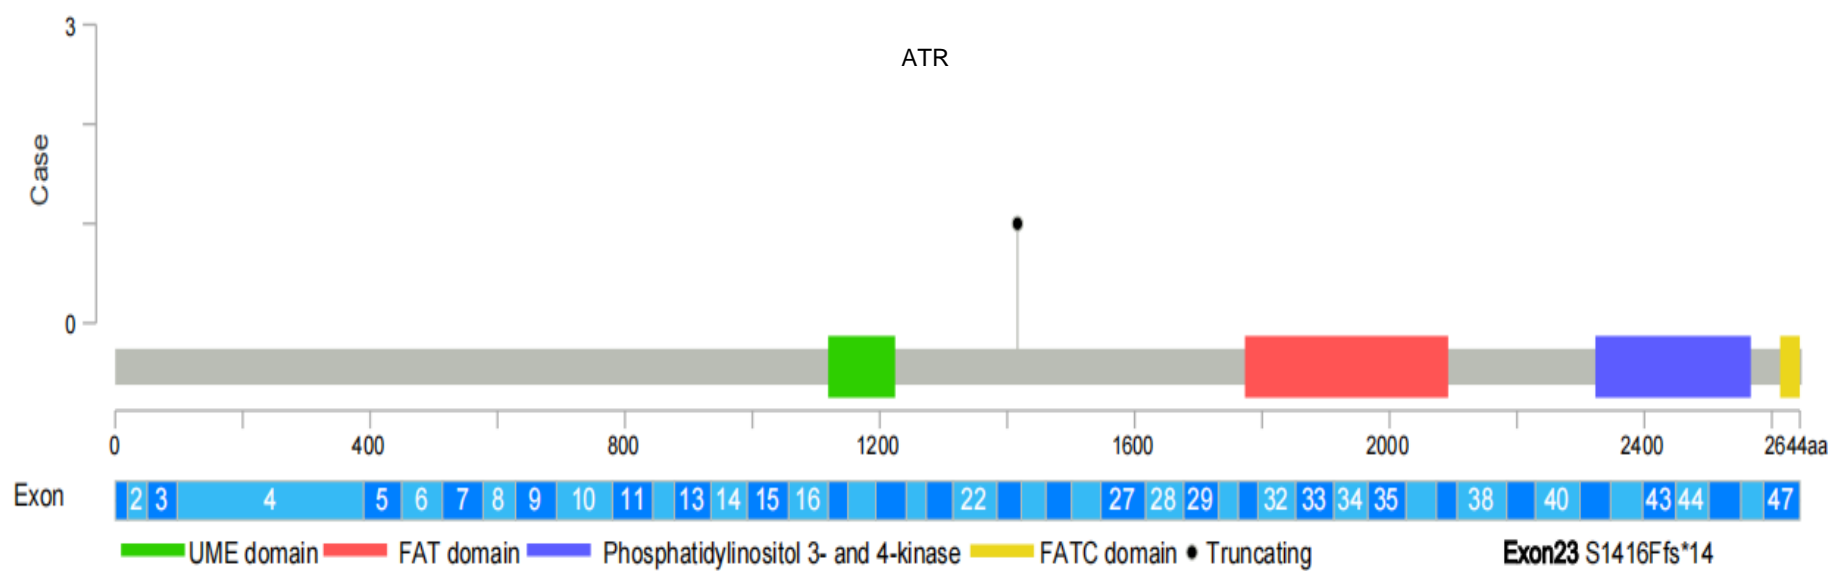

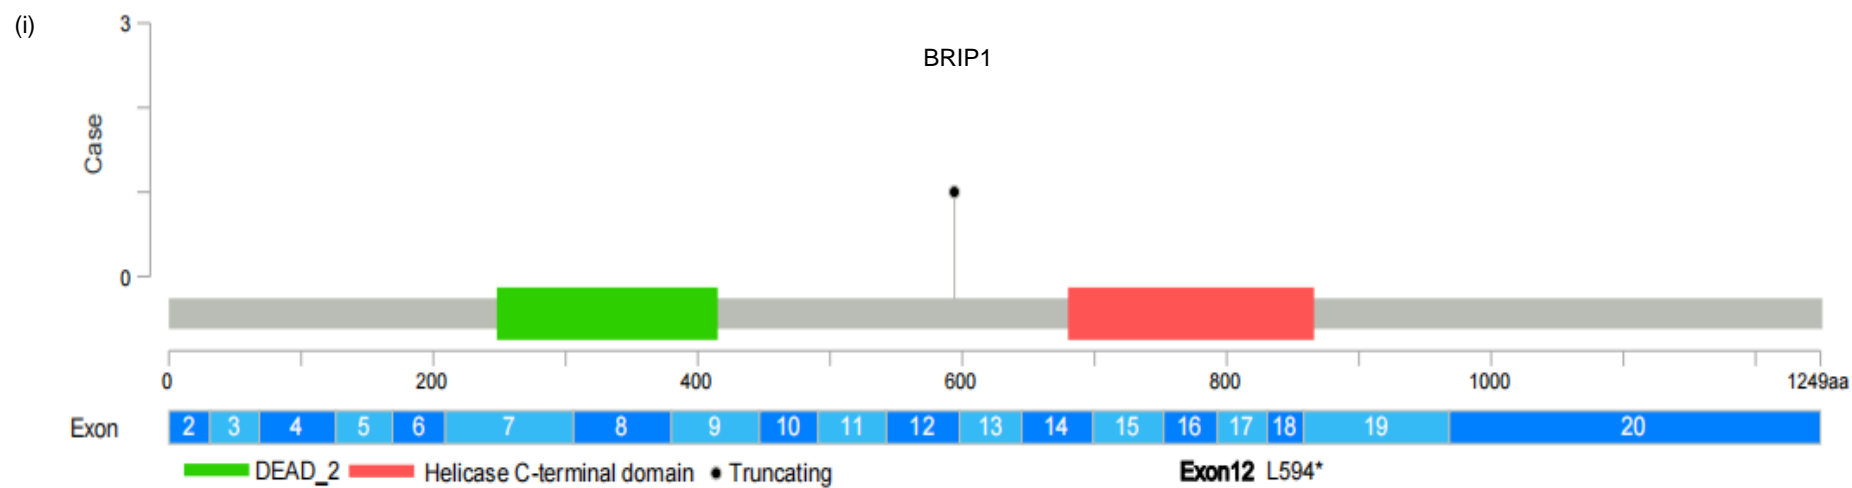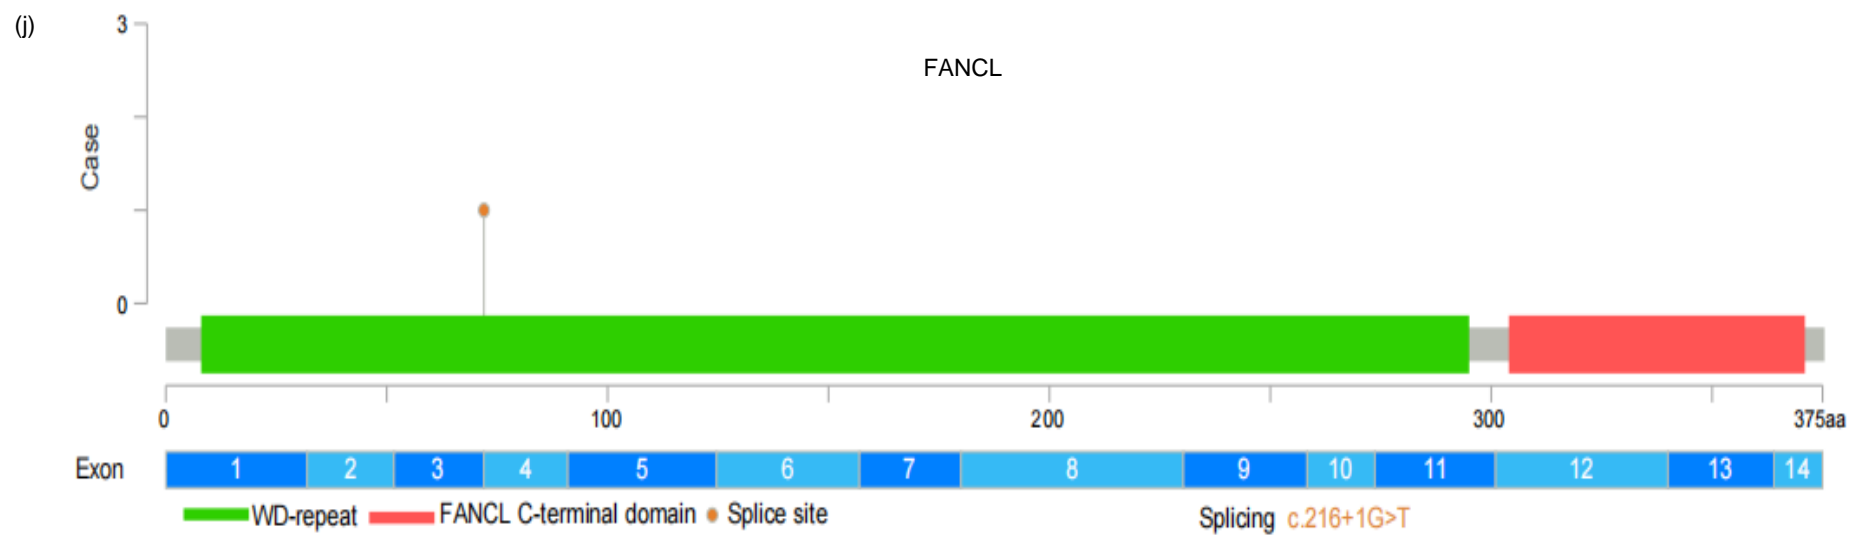

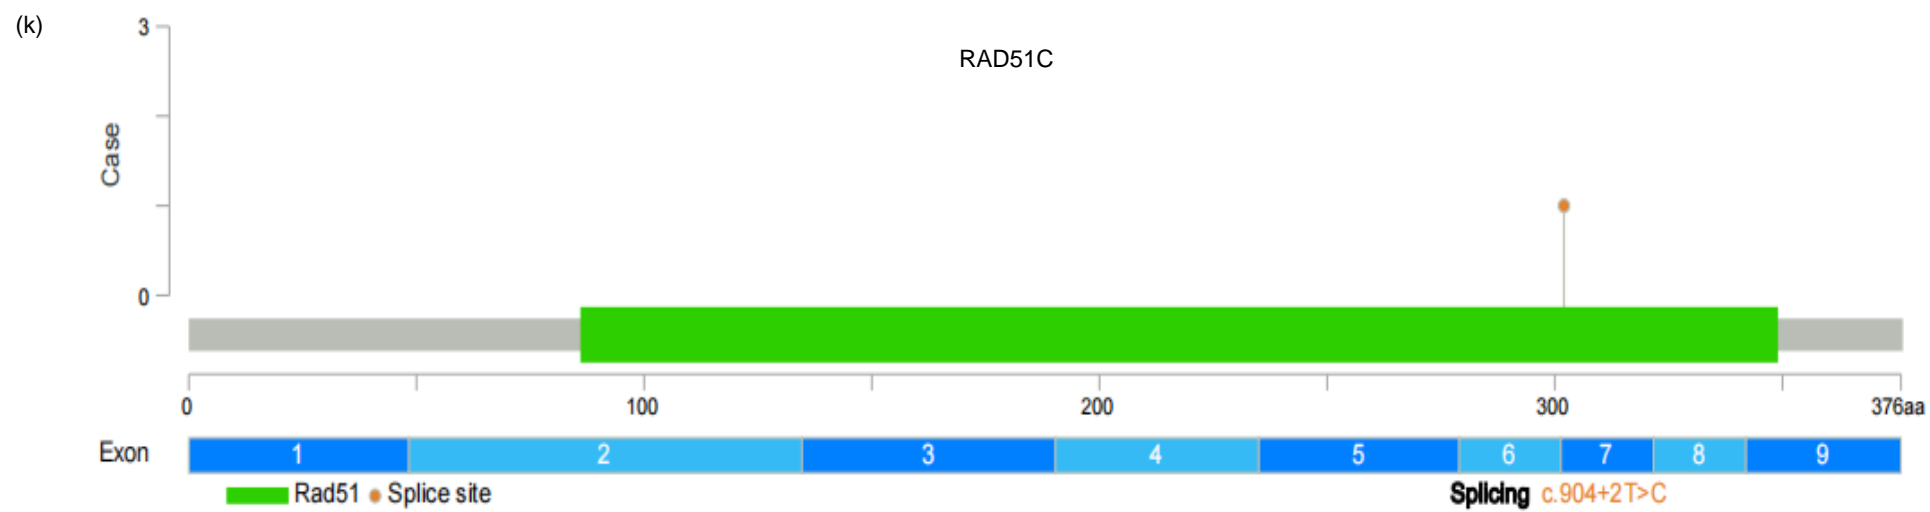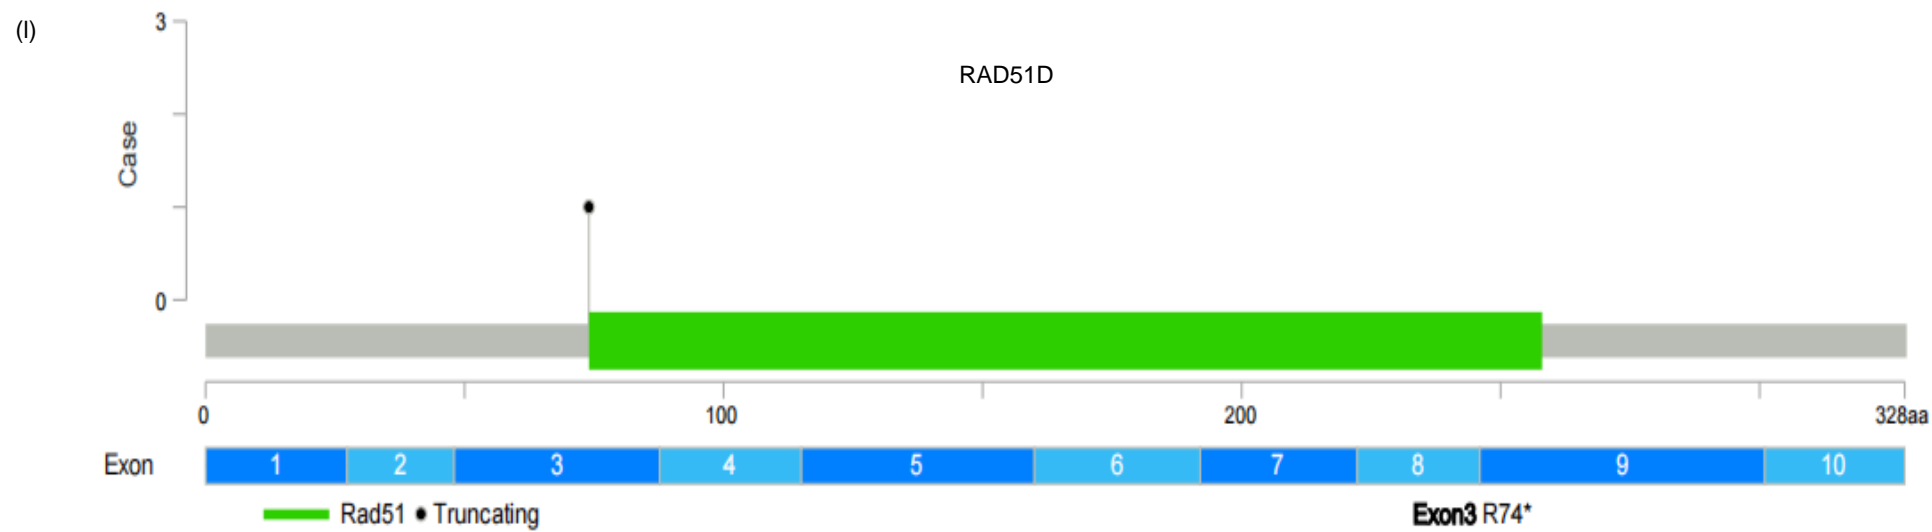

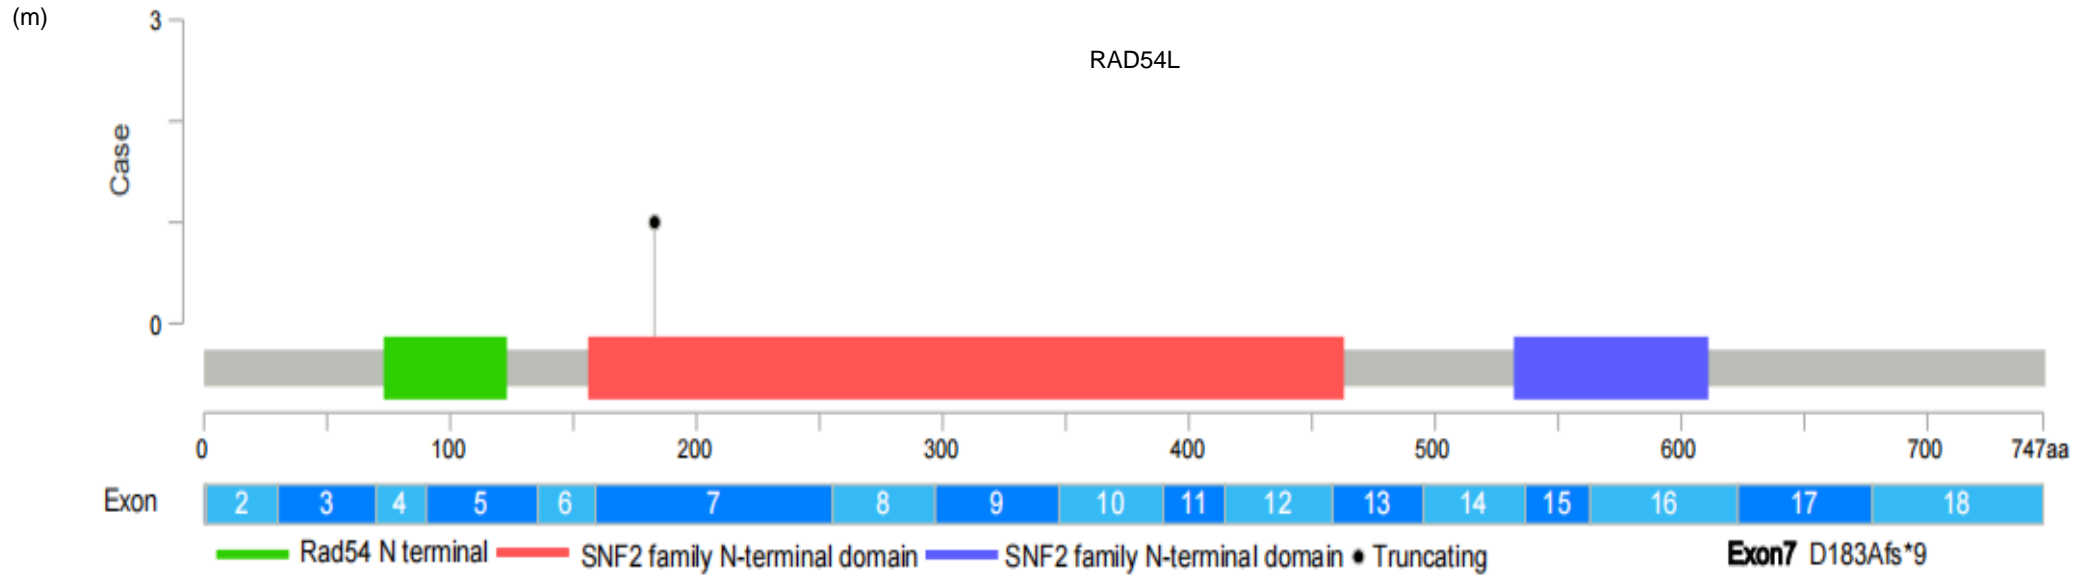

**Figure S1:** Locations of variations in the non-BRCA1/2 proteins. (a) The variations in PALB2 protein. (b) The variations in NBN protein. (c) The variations in MRE11A protein. (d) The variations in TP53 protein. (e) The variations in CHEK1 protein. (f) The variations in CHEK2 protein. (g) The variations in BARD1 protein. (h) The variations in ATR protein. (i) The variations in BRIP1 protein. (j) The variations in FANCL protein. (k) The variations in RAD51C protein. (l) The variations in RAD51D protein. (m) The variations in RAD54L protein.
