# Supplementary material for: Germline Variants in 32 Cancer-Related Genes among 700 Chinese Breast Cancer Patients by Next-Generation Sequencing: A Clinic-Based, Observational Study
Source: MDPI journal article supplement (doi:10.3390/ijms231911266), 2022-09-24
Supplement: s1 [file s1]

**Table S1.** Distribution of deleterious germline variants according to the type of cancer and genetic relationship in breast cancer patients with a positive family history ( $n = 213$ ).

| Family History                    | No. | Panel-gene variants |                |          | HRR-gene variants |                |          | BRCA1/2 variants |                |          |
|-----------------------------------|-----|---------------------|----------------|----------|-------------------|----------------|----------|------------------|----------------|----------|
|                                   |     | Carrier             | Non-carrier    | <i>p</i> | Carrier           | Non-carrier    | <i>p</i> | Carrier          | Non-carrier    | <i>p</i> |
|                                   |     | <i>n</i> = 38       | <i>n</i> = 175 |          | <i>n</i> = 36     | <i>n</i> = 177 |          | <i>n</i> = 30    | <i>n</i> = 183 |          |
| Breast cancer (%)                 |     |                     |                |          |                   |                |          |                  |                |          |
| Yes                               | 112 | 25 ( 65.8)          | 87 (49.7)      | 0.105    | 23 ( 63.9)        | 89 (50.3)      | 0.191    | 20 ( 66.7)       | 92 (50.3)      | 0.142    |
| No                                | 101 | 13 ( 34.2)          | 88 (50.3)      |          | 13 ( 36.1)        | 88 (49.7)      |          | 10 ( 33.3)       | 91 (49.7)      |          |
| BRCA-related cancer <sup>1</sup>  |     |                     |                |          |                   |                |          |                  |                |          |
| (%)                               |     |                     |                |          |                   |                |          |                  |                |          |
| Yes                               | 127 | 28 ( 73.7)          | 99 (56.6)      | 0.077    | 26 ( 72.2)        | 101 (57.1)     | 0.133    | 23 ( 76.7)       | 104 (56.8)     | 0.064    |
| No                                | 86  | 10 ( 26.3)          | 76 (43.4)      |          | 10 ( 27.8)        | 76 (42.9)      |          | 7 ( 23.3)        | 79 (43.2)      |          |
| Gastrointestinal cancer           |     |                     |                |          |                   |                |          |                  |                |          |
| (%)                               |     |                     |                |          |                   |                |          |                  |                |          |
| Yes                               | 50  | 8 ( 21.1)           | 42 (24.0)      | 0.859    | 7 ( 19.4)         | 43 (24.3)      | 0.682    | 7 ( 23.3)        | 43 (23.5)      | 1.000    |
| No                                | 163 | 30 ( 78.9)          | 133 (76.0)     |          | 29 ( 80.6)        | 134 (75.7)     |          | 23 ( 76.7)       | 140 (76.5)     |          |
| Hepatobiliary cancer (%)          |     |                     |                |          |                   |                |          |                  |                |          |
| Yes                               | 17  | 3 ( 7.9)            | 14 ( 8.0)      | 1.000    | 3 ( 8.3)          | 14 ( 7.9)      | 1.000    | 3 ( 10.0)        | 14 ( 7.7)      | 0.939    |
| No                                | 196 | 35 ( 92.1)          | 161 (92.0)     |          | 33 ( 91.7)        | 163 (92.1)     |          | 27 ( 90.0)       | 169 (92.3)     |          |
| Lung cancer (%)                   |     |                     |                |          |                   |                |          |                  |                |          |
| Yes                               | 41  | 8 ( 21.1)           | 33 (18.9)      | 0.933    | 8 ( 22.2)         | 33 (18.6)      | 0.791    | 6 ( 20.0)        | 35 (19.1)      | 1.000    |
| No                                | 172 | 30 ( 78.9)          | 142 (81.1)     |          | 28 ( 77.8)        | 144 (81.4)     |          | 24 ( 80.0)       | 148 (80.9)     |          |
| Gynecological cancer <sup>2</sup> |     |                     |                |          |                   |                |          |                  |                |          |
| (%)                               |     |                     |                |          |                   |                |          |                  |                |          |
| Yes                               | 9   | 3 ( 7.9)            | 6 ( 3.4)       | 0.426    | 3 ( 8.3)          | 6 ( 3.4)       | 0.374    | 3 ( 10.0)        | 6 ( 3.3)       | 0.228    |
| No                                | 204 | 35 ( 92.1)          | 169 (96.6)     |          | 33 ( 91.7)        | 171 (96.6)     |          | 27 ( 90.0)       | 177 (96.7)     |          |
| Urinary cancer <sup>3</sup> (%)   |     |                     |                |          |                   |                |          |                  |                |          |
| Yes                               | 7   | 0 ( 0.0)            | 7 ( 4.0)       | 0.452    | 0 ( 0.0)          | 7 ( 4.0)       | 0.484    | 0 ( 0.0)         | 7 ( 3.8)       | 0.591    |
| No                                | 206 | 38 (100.0)          | 168 (96.0)     |          | 36 (100.0)        | 170 (96.0)     |          | 30 (100.0)       | 176 (96.2)     |          |
| Hematologic cancer (%)            |     |                     |                |          |                   |                |          |                  |                |          |
| Yes                               | 11  | 1 ( 2.6)            | 10 ( 5.7)      | 0.708    | 1 ( 2.8)          | 10 ( 5.6)      | 0.767    | 1 ( 3.3)         | 10 ( 5.5)      | 0.965    |
| No                                | 202 | 37 ( 97.4)          | 165 (94.3)     |          | 35 ( 97.2)        | 167 (94.4)     |          | 29 ( 96.7)       | 173 (94.5)     |          |
| Genetic relationship (%)          |     |                     |                |          |                   |                |          |                  |                |          |
| First-Degree only                 | 115 | 18 ( 47.4)          | 97 (55.4)      | 0.377    | 18 ( 50.0)        | 97 (54.8)      | 0.523    | 14 ( 46.7)       | 101 (55.2)     | 0.486    |
| Second-Degree only                | 44  | 9 ( 23.7)           | 35 (20.0)      |          | 8 ( 22.2)         | 36 (20.3)      |          | 8 ( 26.7)        | 36 (19.7)      |          |
| Third-Degree only                 | 7   | 0 ( 0.0)            | 7 ( 4.0)       |          | 0 ( 0.0)          | 7 ( 4.0)       |          | 0 ( 0.0)         | 7 ( 3.8)       |          |
| More than one degree              | 47  | 11 ( 28.9)          | 36 (20.6)      |          | 10 ( 27.8)        | 37 (20.9)      |          | 8 ( 26.7)        | 39 (21.3)      |          |

<sup>1</sup>BRCA-related cancer: breast cancer, epithelial ovarian cancer (including fallopian tube cancer or peritoneal cancer), exocrine pancreatic cancer and prostate cancer.

<sup>2</sup>Gynecological cancer: ovarian cancer was not included.

<sup>3</sup>Urinary cancer: prostate cancer was not included.

Abbreviation: HRR=homologous recombination repair.
