# Supplementary material for: Germline Variants in 32 Cancer-Related Genes among 700 Chinese Breast Cancer Patients by Next-Generation Sequencing: A Clinic-Based, Observational Study
Source: MDPI journal article supplement (doi:10.3390/ijms231911266), 2022-09-24
Supplement: s1 [file s1]

**Table S2.** List of the 32 cancer-related genes in the multiple-gene NGS panel.

| Gene                         | Reference sequence | Sequencing area                           |
|------------------------------|--------------------|-------------------------------------------|
| <i>AR</i>                    | NM_000044.3        | Entire coding region                      |
| <i>ATM</i> <sup>*,#</sup>    | NM_000051.3        | Entire coding region                      |
| <i>ATR</i> <sup>*,#</sup>    | NM_001184.3        | Entire coding region                      |
| <i>BARD1</i> <sup>*,#</sup>  | NM_000465.3        | Entire coding region                      |
| <i>BRCA1</i> <sup>*,#</sup>  | NM_007294.3        | Entire coding region                      |
| <i>BRCA2</i> <sup>*,#</sup>  | NM_000059.3        | Entire coding region                      |
| <i>BRIP1</i> <sup>*,#</sup>  | NM_032043.2        | Entire coding region                      |
| <i>CDH1</i> <sup>*</sup>     | NM_004360.3        | Entire coding region                      |
| <i>CDK12</i> <sup>*,#</sup>  | NM_016507.3        | Entire coding region                      |
| <i>CHEK1</i> <sup>*,#</sup>  | NM_001274.5        | Entire coding region                      |
| <i>CHEK2</i> <sup>*,#</sup>  | NM_007194.3        | Entire coding region                      |
| <i>ESR1</i>                  | NM_001122740.1     | Entire coding region                      |
| <i>FANCA</i> <sup>*,#</sup>  | NM_000135.2        | Entire coding region                      |
| <i>FANCL</i> <sup>*,#</sup>  | NM_018062.3        | Entire coding region                      |
| <i>HDAC2</i>                 | NM_001527.3        | Entire coding region                      |
| <i>HOXB13</i>                | NM_006361.5        | Entire coding region                      |
| <i>MRE11A</i> <sup>*,#</sup> | NM_005591.3        | Entire coding region                      |
| <i>NBN</i> <sup>*,#</sup>    | NM_002485.4        | Entire coding region                      |
| <i>PALB2</i> <sup>*,#</sup>  | NM_024675.3        | Entire coding region                      |
| <i>PPP2R2A</i> <sup>*</sup>  | NM_002717.3        | Entire coding region                      |
| <i>PTEN</i> <sup>*</sup>     | NM_000314.4        | Entire coding region                      |
| <i>RAD51B</i> <sup>#</sup>   | NM_133509.3        | Entire coding region                      |
| <i>RAD51C</i> <sup>*,#</sup> | NM_058216.2        | Entire coding region                      |
| <i>RAD51D</i> <sup>*,#</sup> | NM_133629.2        | Entire coding region                      |
| <i>RAD54L</i> <sup>*,#</sup> | NM_001142548.1     | Entire coding region                      |
| <i>STK11</i> <sup>*</sup>    | NM_000455.4        | Entire coding region                      |
| <i>TP53</i> <sup>*</sup>     | NM_000546.5        | Entire coding region                      |
| <i>BRAF</i> <sup>*</sup>     | NM_004333.4        | Hot-spot (exon 11/12/15/18)               |
| <i>ERBB2</i>                 | NM_004448.3        | Hot-spot (exon 1/3/8/9/11/16-21/23/25/27) |
| <i>KRAS</i> <sup>*</sup>     | NM_033360.3        | Hot-spot (exon 2/3/4)                     |
| <i>NRAS</i> <sup>*</sup>     | NM_002524.4        | Hot-spot (exon 2/3/4)                     |
| <i>PIK3CA</i>                | NM_006218.2        | Hot-spot (exon 2/5/6/8/10/14/21)          |

\* cancer-susceptibility gene

# HRR ( homologous recombination repair )-related gene
